# Supplementary material
Source: Royal Society of Chemistry journal article supplement (doi:10.1039/d6tc00262e)
Supplement: d6tc00262e1.pdf [file d6tc00262e1.pdf]

## Supplementary Information

### Influence of composition and structure on resistive switching properties of hafnium-titanium-oxide thin films grown by atomic layer deposition

Toomas Daniel Viskus\*<sup>1</sup>, Lauri Aarik<sup>1</sup>, Tõnis Arroval<sup>1</sup>, Aarne Kasikov<sup>1</sup>, Joonas Merisalu<sup>1</sup>, Jekaterina Kozlova<sup>1</sup>, Markus Otsus<sup>1</sup>, Hugo Mändar<sup>1</sup>, Jaan Aarik<sup>1</sup>, Guillermo Vinuesa<sup>2</sup>, Salvador Dueñas<sup>2</sup>, Helena Castán<sup>2</sup>, Kaupo Kukli<sup>1</sup>

<sup>1</sup> University of Tartu, Institute of Physics, W. Ostwaldi 1, 50411 Tartu, Estonia

<sup>2</sup> Departamento de Electricidad y Electrónica, E.T.S.I. Telecomunicación, Universidad de Valladolid, Campus 'Miguel Delibes', 47011 Valladolid, Spain

\* Corresponding author, e-mail: [toomas.daniel.viskus@ut.ee](mailto:toomas.daniel.viskus@ut.ee)

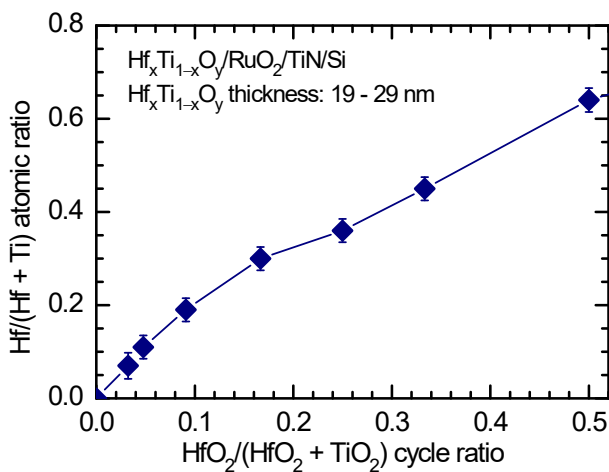

**Figure S1.** Hf/(Hf + Ti) atomic ratio in HfO<sub>2</sub>/TiO<sub>2</sub> films as a function of HfO<sub>2</sub>/(HfO<sub>2</sub> + TiO<sub>2</sub>) atomic-layer-deposition cycle ratio. The films were deposited at 350 °C on RuO<sub>2</sub>/TiN electrodes using HfCl<sub>4</sub>, TiCl<sub>4</sub> and H<sub>2</sub>O as the precursors.

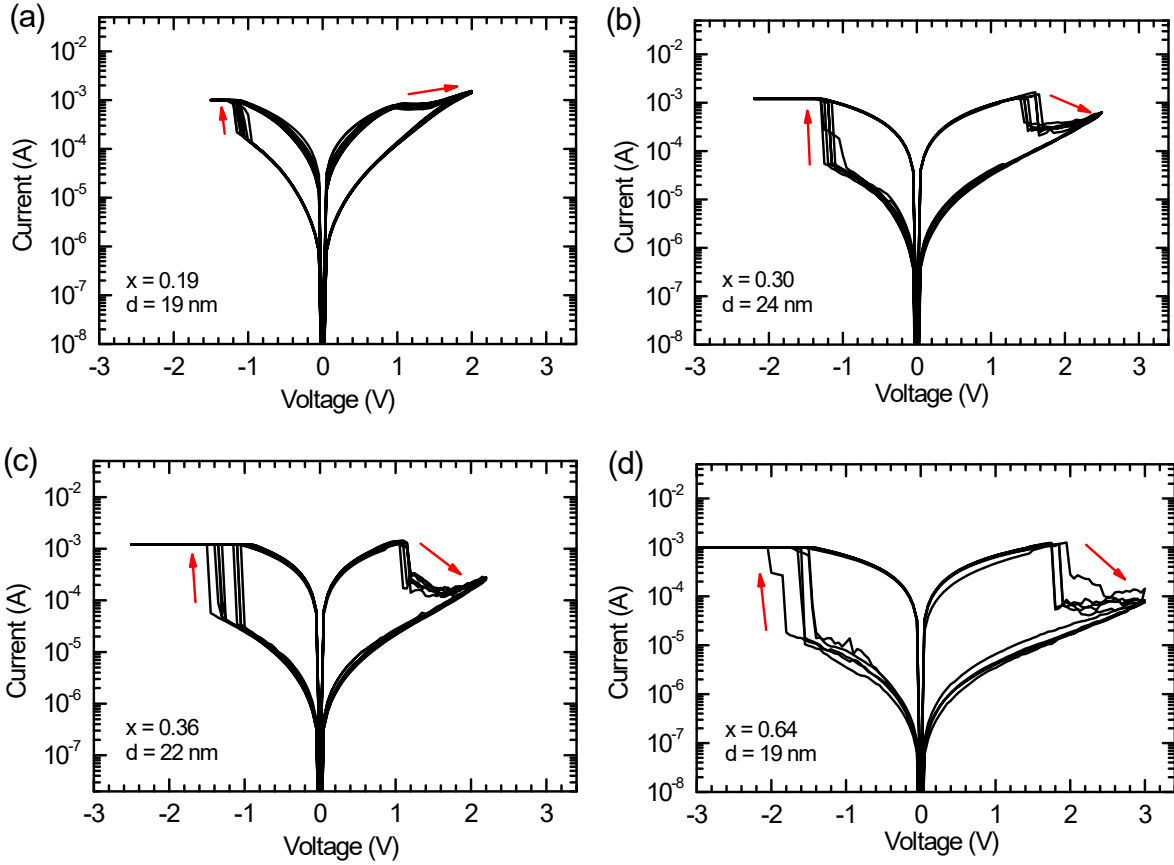

**Figure S2.** Current-voltage characteristics of Pt/Hf<sub>x</sub>Ti<sub>1-x</sub>O<sub>y</sub>/RuO<sub>2</sub>/TiN RS structures with  $x$  values of (a) 0.19, (b) 0.30, (c) 0.36, and (d) 0.64 in the Hf<sub>x</sub>Ti<sub>1-x</sub>O<sub>y</sub> layer. The Hf<sub>x</sub>Ti<sub>1-x</sub>O<sub>y</sub> layer thicknesses are shown in the figure.

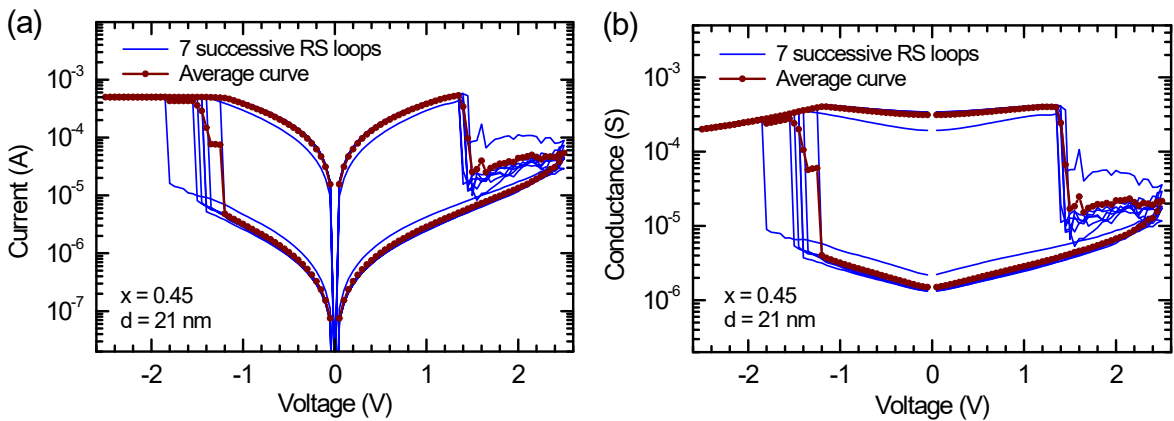

**Figure S3.** Impact of averaging on the shapes of (a) current-voltage and (b) conductance-voltage characteristics of a Pt/Hf<sub>x</sub>Ti<sub>1-x</sub>O<sub>y</sub>/RuO<sub>2</sub>/TiN RS structure with  $x$  of 0.45 in Hf<sub>x</sub>Ti<sub>1-x</sub>O<sub>y</sub>.

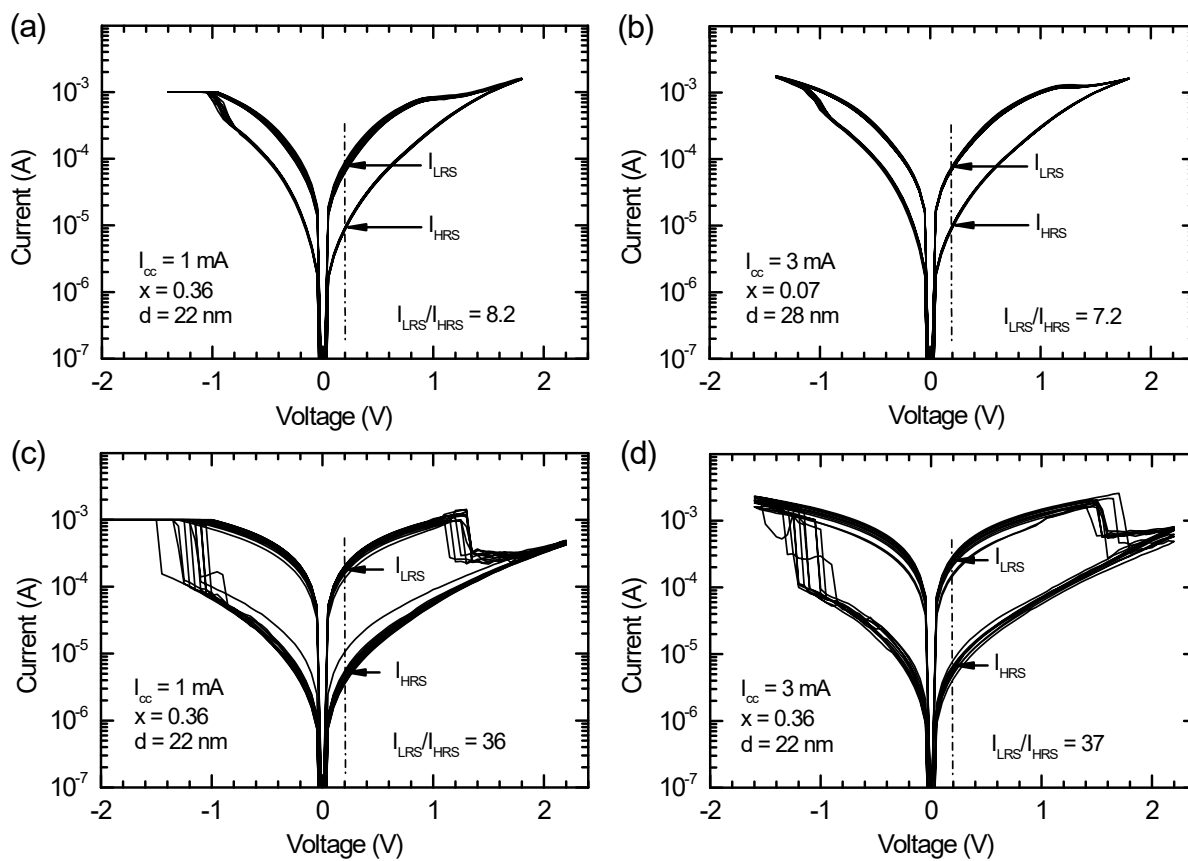

**Figure S4.** Current-voltage characteristics of Pt/Hf<sub>x</sub>Ti<sub>1-x</sub>O<sub>y</sub>/RuO<sub>2</sub>/TiN RS structures with  $x$  values of (a,b) 0.07 and (c,d) 0.36. The characteristics were recorded using compliance current ( $I_{cc}$ ) of (a,c) 1 mA and (b,d) 3 mA.

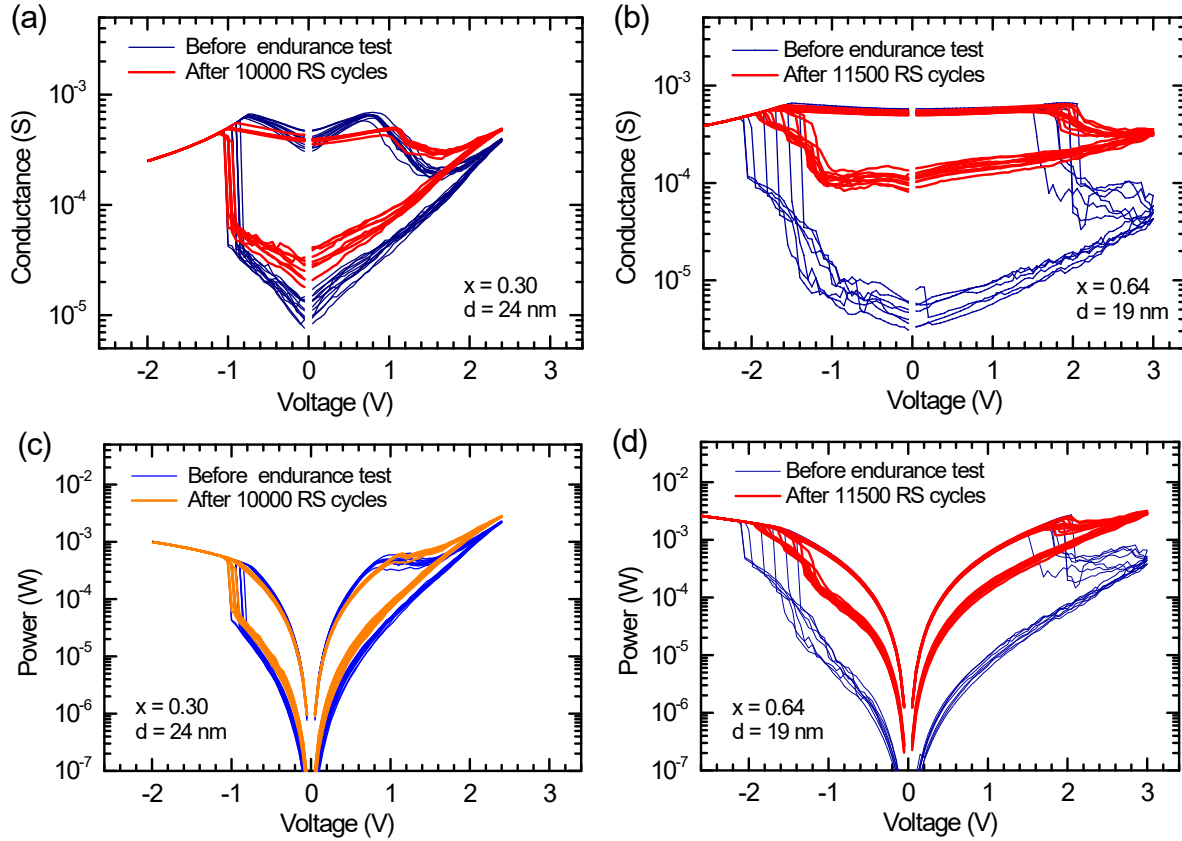

**Figure S5.** (a,b) Conductance-voltage and (c,d) power-voltage characteristics of Pt/Hf<sub>x</sub>Ti<sub>1-x</sub>O<sub>y</sub>/RuO<sub>2</sub>/TiN RS structures with  $x$  values of (a,c) 0.30 and (b,d) 0.64, recorded before and after endurance tests.

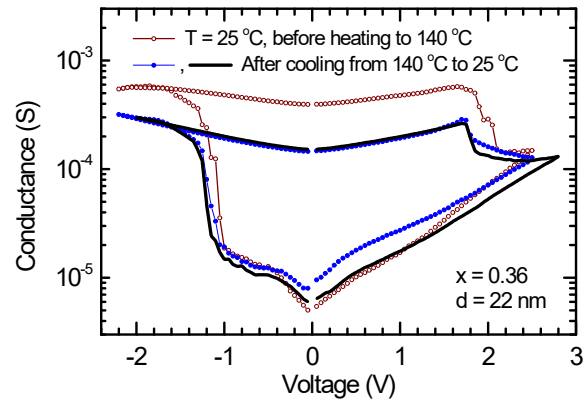

**Figure S6.** Conductance versus voltage characteristics of a Pt/Hf<sub>x</sub>Ti<sub>1-x</sub>O<sub>y</sub>/RuO<sub>2</sub>/TiN RS structure with  $x$  of 0.36 in the Hf<sub>x</sub>Ti<sub>1-x</sub>O<sub>y</sub> layer. The characteristics were recorded at 25 °C with voltages ranging from -2.2 to 2.5 V before heating the sample to 140 °C and with voltages ranging from -2.2 to 2.5 V and from -2.2 to 2.8 V after cooling from 140 to 25 °C. The compliance current was kept at -1.2 mA during the measurement of current-voltage characteristics used for calculation of conductance-voltage characteristics.

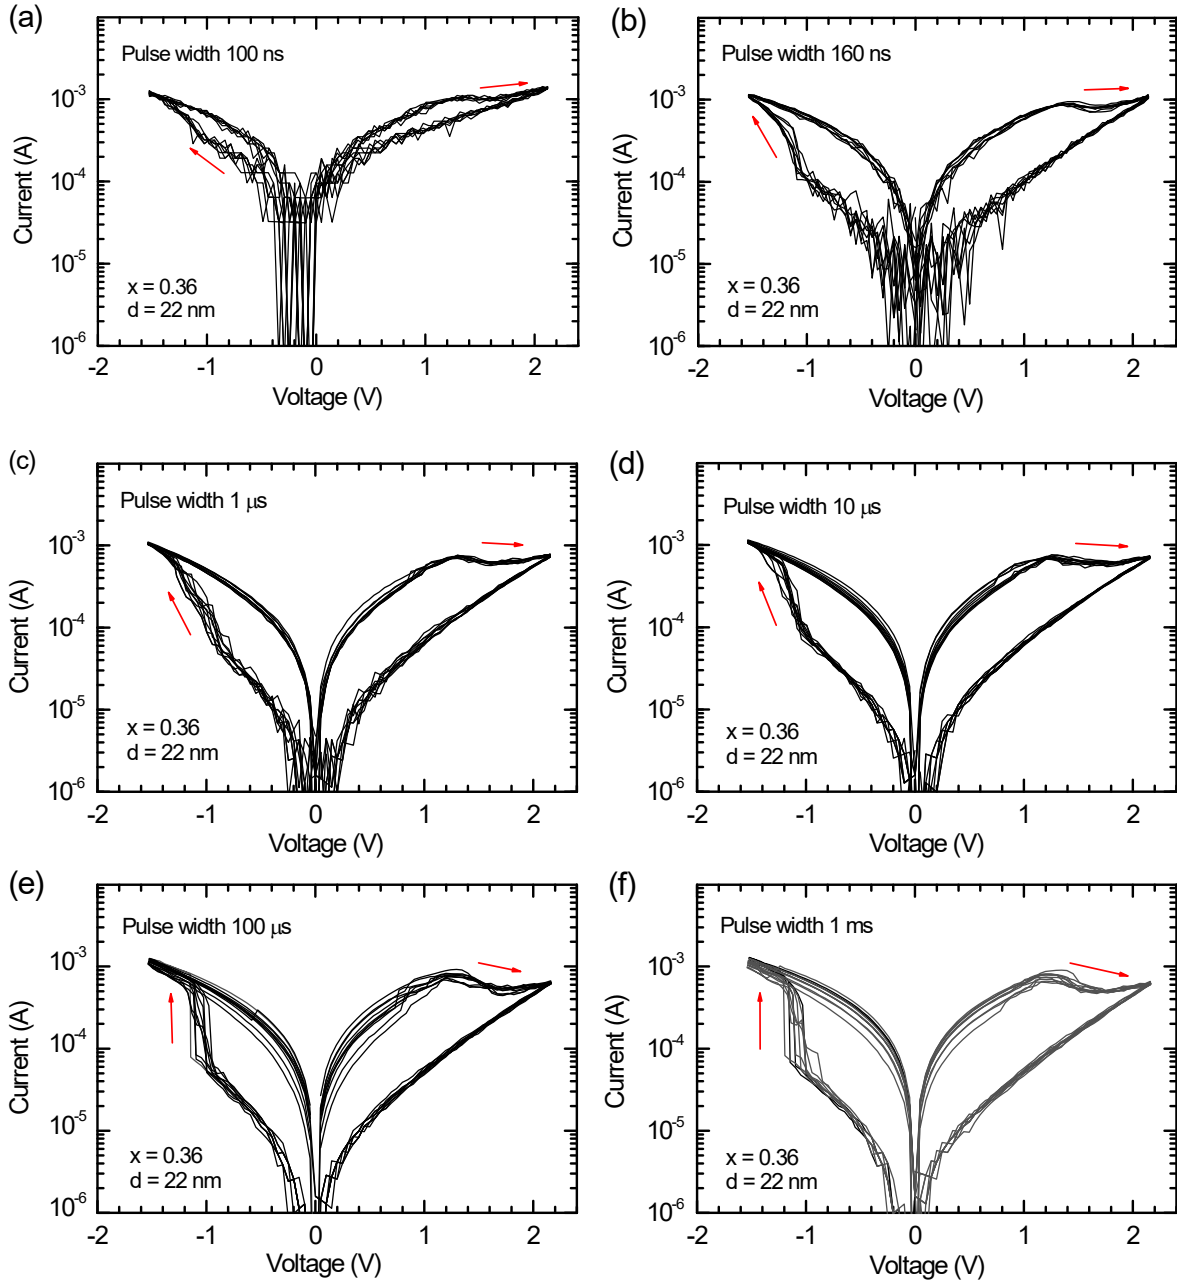

**Figure S7.** Current-voltage characteristic of a Pt/Hf<sub>x</sub>Ti<sub>1-x</sub>O<sub>y</sub>/RuO<sub>2</sub>/TiN RS structure with  $x$  of 0.36 in the Hf<sub>x</sub>Ti<sub>1-x</sub>O<sub>y</sub> layer. The characteristics were recorded at room temperature in the pulse mode using pulse durations of (a) 100 ns, (b) 160 ns, (c) 1  $\mu$ s, (d) 10  $\mu$ s, (e) 100  $\mu$ s, and (f) 1 ms.
